# Supplementary material for: The effect of mechano-stimuli on the amorphous-to-crystalline transition of mechanochromic luminescent materials
Source: Royal Society of Chemistry journal article supplement (doi:10.1039/c4ce01212g), 2014-09-09
Supplement: c4ce01212g1.pdf [file c4ce01212g1.pdf]

## The Effect of Mechano-stimuli on the Amorphous-to-Crystalline Transition of Mechanochromic Luminescence Materials

Yun Lv, Yang Liu,\* Xin Ye, Guangfeng Liu, Xutang Tao\*

### Contents

- Scheme S1.** Synthetic routes to the compound BBFT, BFT1, BFT2.
- Figure S1.**  $^1\text{H}$  NMR (a) and  $^{13}\text{C}$  NMR (b) spectra of BBFT in  $\text{CDCl}_3$ .
- Figure S2.**  $^1\text{H}$  NMR (a) and  $^{13}\text{C}$  NMR (b) spectra of BFT1 in  $\text{CD}_2\text{Cl}_2$ .
- Figure S3.**  $^1\text{H}$  NMR (a) and  $^{13}\text{C}$  NMR (b) spectra of BFT2 in  $\text{CDCl}_3$ .
- Figure S4.** Fluorescence images of BBFT (a), BFT1 (b), and BFT2 (c) in the grinding process.
- Figure S5.** DSC and TGA thermograms of BBFT in the crystalline and amorphous state.
- Figure S6.** DSC and TGA thermograms of BFT1 in the crystalline and amorphous state.
- Figure S7.** DSC and TGA thermograms of BFT2 in the crystalline and amorphous state.
- Figure S8.** The grinding effect on the BFT1 powder.
- Figure S9.** The grinding effect on the BFT2 powder.
- Figure S10.** The crystal structures and dihedral angles of BBFT (a), BFT1 (b), BFT2 (c).
- Figure S11.** Normalized absorption (a) and emission (b) spectra of BFT1 solids under different conditions.
- Figure S12.** Normalized absorption (a) and emission (b) spectra of BFT2 solids under different conditions.
- Table S1.** The crystal data, intensity collection details and refinement parameters of BBFT.
- Table S2.** The crystal data, intensity collection details and refinement parameters of BFT1.
- Table S3.** The crystal data, intensity collection details and refinement parameters of BFT2.
- Table S4.** Bond lengths [ $\text{\AA}$ ] for BBFT molecule.
- Table S5.** Bond angles [deg] for BBFT molecule.
- Table S6.** Bond lengths [ $\text{\AA}$ ] for the optimized BBFT molecule.
- Table S7.** Bond angles [deg] for the optimized BBFT molecule.

## Experimental Section

### Materials and Instrumentations

Tetrahydrofuran (THF) was distilled from sodium benzophenone ketyl under nitrogen immediately prior to use. All reagents were purchased from Aldrich and Acros (>98%) and used as without further purification. In this paper, McMurry coupling was adopted to make the compounds 1,2-bis (7-bromo-9,9-dibutyl-fluorenyl)-1,2-diphenylethene (BBFT), 1,2-bis (9,9-dibutyl-fluorenyl)-1,2-diphenylethene (BFT1), and 1,2-bis (2-fluorenyl-7-bromo)-1,2-diphenylethene (BFT2).

$^1\text{H}$  and  $^{13}\text{C}$  NMR spectroscopy were measured on a Bruker Advance 400 spectrometer in  $\text{CDCl}_3$  and  $\text{CD}_2\text{Cl}_2$  with tetramethylsilane (TMS;  $\delta = 0$  ppm) as internal reference. Coupling constants ( $J$ ) are given in hertz (Hz). High resolution mass spectrometry was carried out with a Q-TOF6510 spectrograph (Agilent). Elemental analyses were performed using a Perkin Elmer 2400II elemental analyzer. The crystal structure analysis was carried out on a Bruker SMART APEX-II equipped with CCD area-detector diffractometer at 296(2) K using graphite-monochromated Mo K $\alpha$  radiation ( $\lambda = 0.71073$  Å) with the  $\omega$  scan method. The structures were solved by direct methods and refined by full-matrix least-squares technique on  $F^2$  using SHELX programs. The crystallographic datas of BBFT, BFT1, and BFT2 have been deposited in the Cambridge Crystallographic Data centre. X-ray diffraction (XRD) data was collected using a Bruker-AXS D8 ADVANCE X-ray diffractometer at room temperature (Cu-K $\alpha$  radiation, 1.5418 Å). Data was collected in the  $2\theta$  range of 10-50° with a step size of 0.02. Photoluminescence spectra (PL) and fluorescence quantum yield were collected on an Edinburgh Instruments FS920 spectrofluorimeter equipped with Xe-900 and integrating sphere. UV-Vis spectrum was characterized with Shimadzu UV-Vis-2550. Differential scanning calorimetry and thermogravimetry analysis (DSC/TGA) were performed using SDT Q600 V8.1 Build 99 TA Instruments under nitrogen atmosphere.

## Luminogen Preparation

The BBFT, BFT1, BFT2 were synthesized according to the synthetic routes shown in Scheme S1.

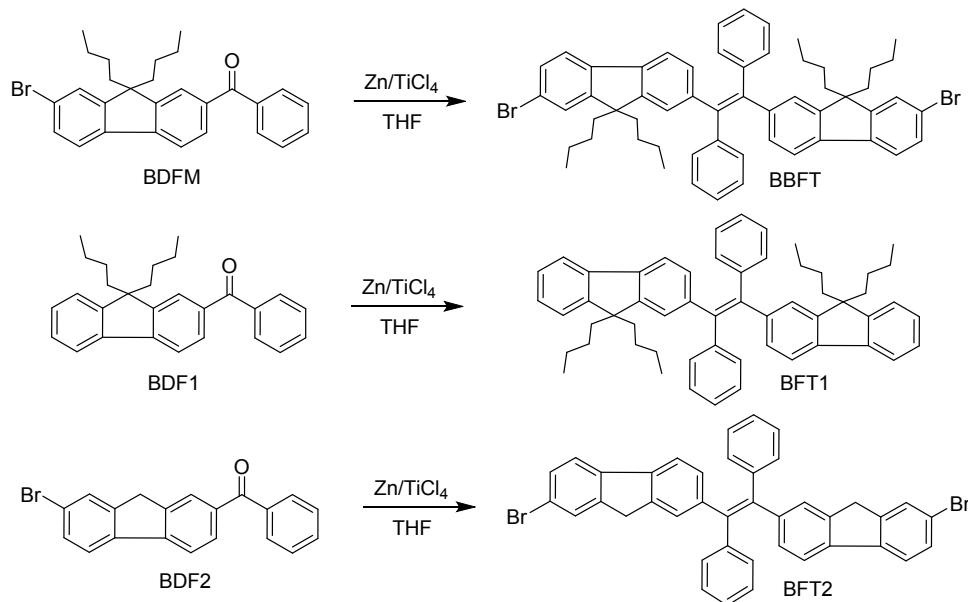

Scheme S1. Synthetic routes to the compounds BBFT, BFT1, BFT2.

**1,2-bis (7-bromo-9,9-dibutyl-fluorenyl)-1,2-diphenylethene (BBFT).** 4.4 g (9.56 mmol) of BDFM and 2.4 g (36 mmol) of Zn powder was added to a 250 ml pre-dried three-necked round-bottom flask with a magnetic stirrer and a water condenser. The flask was evacuated under vacuum and flushed with nitrogen for three times. 150 mL of freshly distilled THF was injected into the flask and the mixture was stirred under an ice-bath for a period of time. 2.10 mL (16.8 mmol) of TiCl<sub>4</sub> was injected drop-wise into the flask and the mixture was stirred again for 0.5 h on an ice bath. The mixture was refluxed at 80°C overnight. After cooling and solvent evaporation, 150 ml of deionized water and 50 ml of sodium carbonate solution were added to the reaction mixture. Then 10M HCl was added to the reaction mixture to adjust the pH of the solution to be 7. The mixture was extracted with dichloromethane and the organic layer was obtained. The crude product was condensed and purified over silica gel using 10:1 petroleum benzine/DCM as eluent. <sup>1</sup>H NMR and <sup>13</sup>C NMR of BBFT: <sup>1</sup>H NMR (CDCl<sub>3</sub>, 400 MHz) δ (TMS, ppm): 7.41-7.35 (m, 8H), 7.10-7.03 (m, 14H), 1.78-1.66 (m, 8H), 1.04-0.93 (m, 8H), 0.71-0.62 (m, 12H), 0.47-0.41 (m, 8H). <sup>13</sup>C

NMR ( $\text{CDCl}_3$ , 100 MHz)  $\delta$  (TMS, ppm): 153.20, 153.17, 149.72, 144.16, 143.94, 143.58, 143.55, 141.16, 140.90, 139.98, 139.89, 138.45, 138.34, 131.54, 131.44, 130.66, 130.40, 129.82, 129.76, 127.59, 126.57, 126.50, 126.24, 126.07, 125.99, 125.93, 120.93, 120.82, 120.79, 119.16, 119.02, 55.08, 40.03, 25.92, 25.74, 22.97, 22.90, 13.95, 13.87. HRMS (ESI): 890.2847 ( $[\text{M}]^+$ ), calcd. for  $\text{C}_{56}\text{H}_{58}\text{Br}_2$  890.2885. Anal. Calcd. For  $\text{C}_{56}\text{H}_{58}\text{Br}_2$ : C, 75.50; H, 6.56. Found: C, 75.18; H, 6.97.

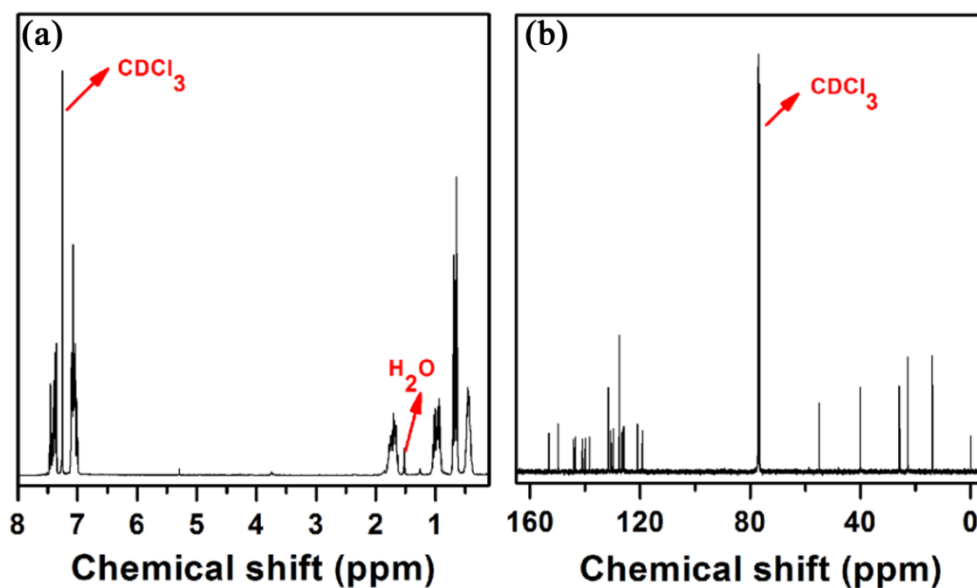

Figure S1.  $^1\text{H}$  NMR (a) and  $^{13}\text{C}$  NMR (b) spectra of BBFT in  $\text{CDCl}_3$ .

**1,2-bis(9,9-dibutyl-fluorenyl)-1,2-diphenylethene1 (BFT1).** 3.8g (9.94 mmol) of BDF1 and 2.6 g (39 mmol) of Zn powder was added to a 250 ml pre-dried three-necked round-bottom flask with a magnetic stirrer and a water condenser. The flask was evacuated under vacuum and flushed with nitrogen for three times. 150 mL of freshly distilled THF was injected into the flask and the mixture was stirred under an ice-bath for a period of time. 2.50 mL (19.09 mmol) of  $\text{TiCl}_4$  was injected drop-wise into the flask and the mixture was stirred again for 0.5 h on an ice bath. The mixture was refluxed at  $80^\circ\text{C}$  overnight. After cooling and solvent evaporation, 150 ml of deionized water and 50 ml of sodium carbonate solution were added to the reaction mixture. Then 10M HCl was added to the reaction mixture to adjust the pH of the solution to be 7. The mixture was extracted with dichloromethane and the organic layer was obtained. The crude product was condensed and purified over silica gel using 8:1 petroleum benzin/DCM as eluent.  $^1\text{H}$  NMR and  $^{13}\text{C}$  NMR of BFT1:  $^1\text{H}$

NMR ( $\text{CD}_2\text{Cl}_2$ , 400 MHz)  $\delta$  (TMS, ppm): 7.63-7.60 (m, 2H), 7.50-7.47 (m, 2H), 7.29-7.26 (m, 6H), 7.10-7.06 (m, 12H), 7.01-6.98 (m, 2H), 1.87-1.78 (m, 4H), 1.72-1.64 (m, 4H), 1.03-0.97 (m, 8H), 0.69-0.64 (m, 12H), 0.45-0.37 (m, 8H).  $^{13}\text{C}$  NMR ( $\text{CD}_2\text{Cl}_2$ , 100 MHz)  $\delta$  (TMS, ppm): 150.95, 150.03, 144.20, 143.19, 141.24, 140.92, 139.34, 131.40, 130.05, 127.48, 126.79, 126.61, 126.44, 126.20, 122.74, 119.40, 118.82, 54.71, 40.04, 26.00, 22.93, 13.71. HRMS (ESI): 733.4710 ( $[\text{M}]^+$ ), calcd. for  $\text{C}_{56}\text{H}_{60}$  732.4695.

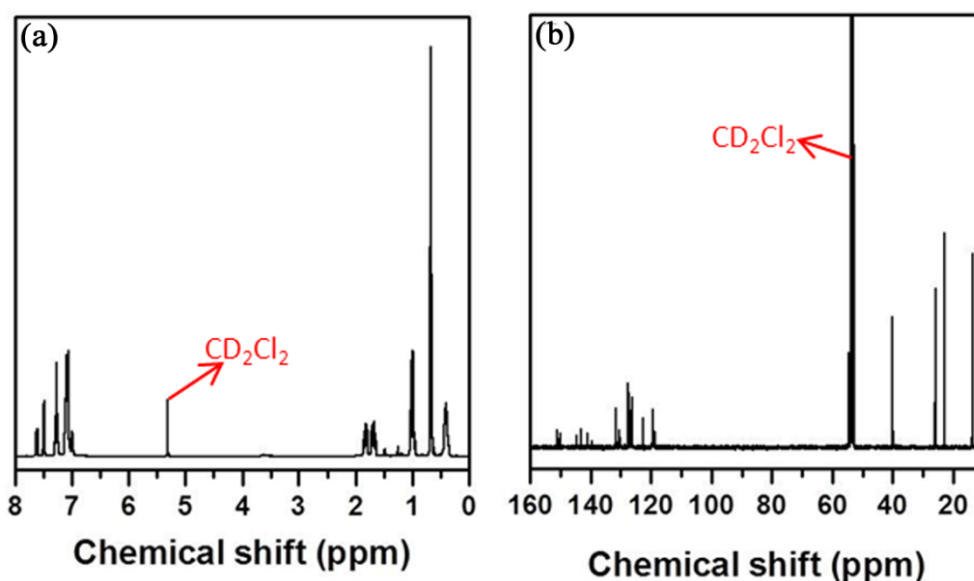

**Figure S2.**  $^1\text{H}$  NMR (a) and  $^{13}\text{C}$  NMR (b) spectra of BFT1 in  $\text{CD}_2\text{Cl}_2$ .

**1,2-bis (2-fluorenyl-7-bromo)-1,2-diphenylethene (BFT2).** 3.5g (10.05 mmol) of BDF2 and 2.6 g (39 mmol) of Zn powder was added to a 250 ml predried three-necked round-bottom flask with a magnetic stirrer and a water condenser. The flask was evacuated under vacuum and flushed with nitrogen for three times. 150 mL of freshly distilled THF was injected into the flask and the mixture was stirred under an ice-bath for a period of time. 2.60 mL (19.85 mmol) of  $\text{TiCl}_4$  was injected drop-wise into the flask and the mixture was stirred again for 0.5 h on an ice bath. The mixture was refluxed at  $80^\circ\text{C}$  overnight. After cooling and solvent evaporation, 150 ml of deionized water and 50 ml of sodium carbonate solution were added to the reaction mixture. Then 10M HCl was added to the reaction mixture to adjust the pH of the solution to be 7. The mixture was extracted with dichloromethane and the organic layer was obtained. The crude product was condensed and purified over silica

gel using 6:1 petroleum benzine/DCM as eluent.  $^1\text{H}$  NMR and  $^{13}\text{C}$  NMR of BFT2:  $^1\text{H}$  NMR ( $\text{CDCl}_3$ , 400 MHz)  $\delta$  (TMS, ppm): 7.63-7.62 (m, 2H), 7.60-7.44 (m, 6H), 7.24-7.21 (m, 2H), 7.15-7.07 (m, 12H), 3.71-3.70 (m, 4H).  $^{13}\text{C}$  NMR ( $\text{CDCl}_3$ , 100 MHz)  $\delta$  (TMS, ppm): 145.54, 145.52, 143.09, 143.87, 143.04, 143.01, 142.33, 141.20, 140.57, 140.51, 139.00, 138.98, 131.42, 130.53, 130.51, 129.84, 128.18, 127.98, 127.90, 127.80, 127.72, 126.51, 121.03, 120.27, 119.20, 119.11, 36.62, 29.70. HRMS (ESI): 666.0363 ( $[\text{M}]^+$ ), calcd. for  $\text{C}_{40}\text{H}_{26}\text{Br}_2$  666.0381.

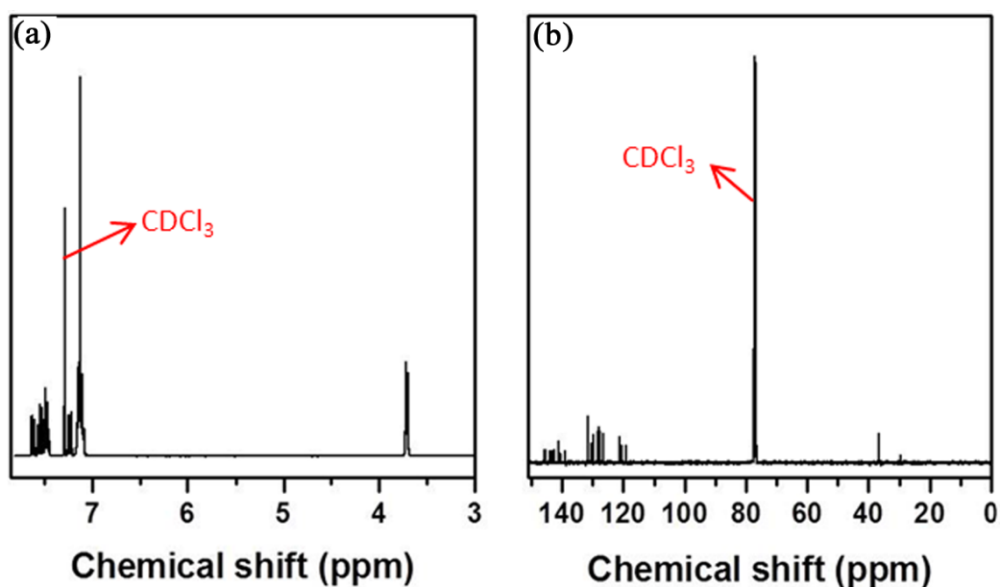

Figure S3.  $^1\text{H}$  NMR (a) and  $^{13}\text{C}$  NMR (b) spectra of BFT2 in  $\text{CDCl}_3$ .

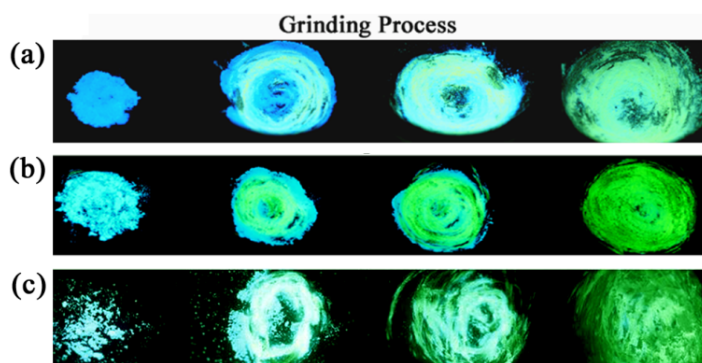

Figure S4. Fluorescence images of BBFT (a), BFT1 (b), and BFT2 (c) in the grinding process.

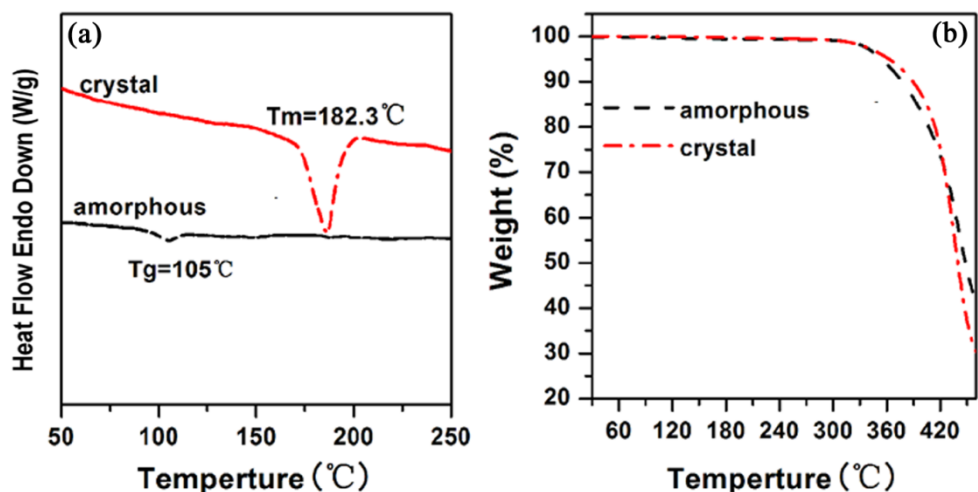

Figure S5. DSC and TGA thermograms of BBFT in the crystalline and amorphous state.

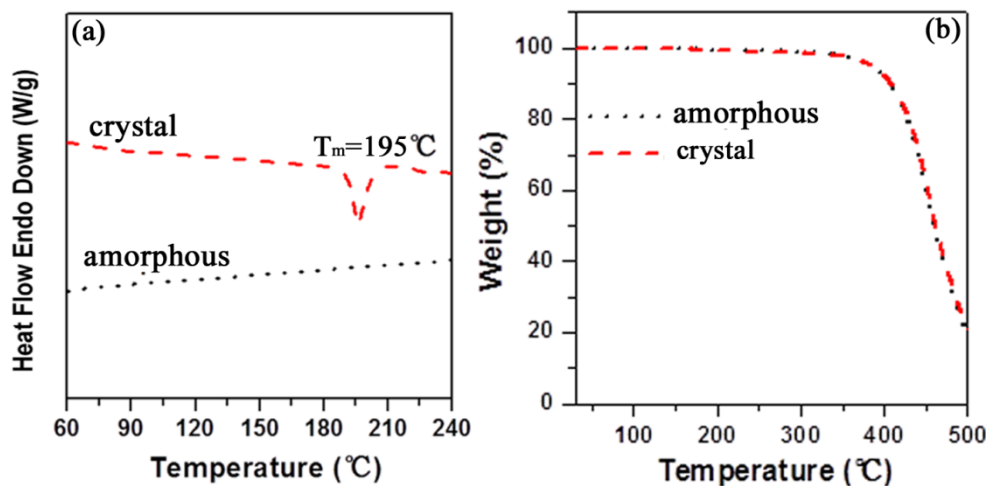

Figure S6. DSC and TGA thermograms of BFT1 in the crystalline and amorphous state.

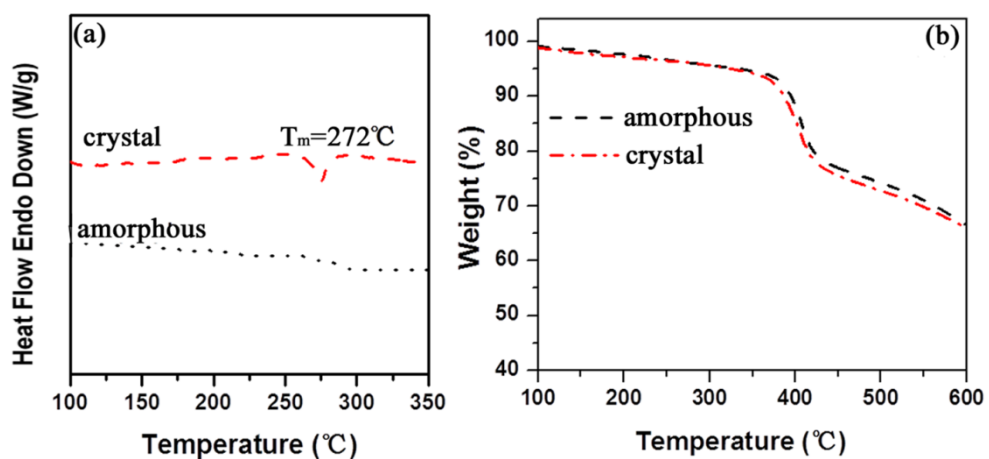

Figure S7. DSC and TGA thermograms of BFT2 in the crystalline and amorphous state.

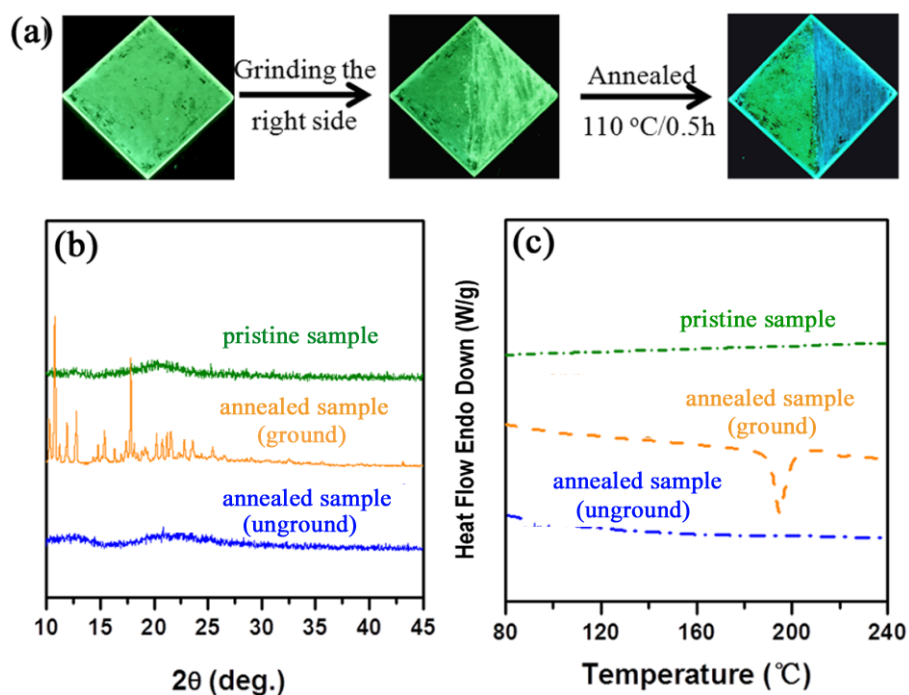

**Figure S8.** Comparison of the grinding effect on the thermal annealing crystallization by grinding a half side of a pristine BFT1 film and then annealing the whole piece of film (a) and XRD patterns (b) and DSC thermograms of BFT1 (c) under different conditions. Photos were taken under UV irradiation at 365 nm.

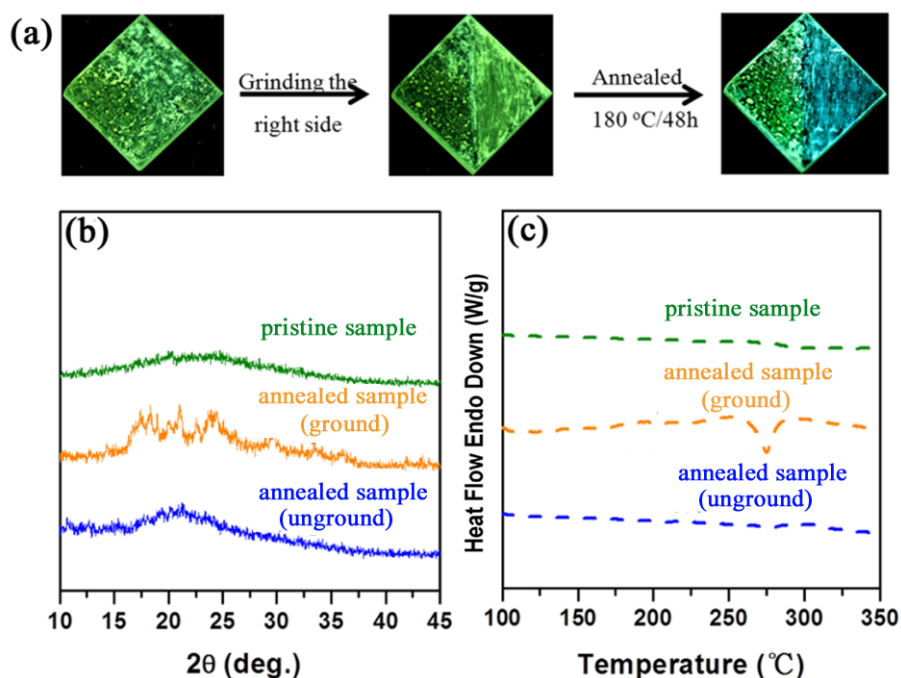

**Figure S9.** Comparison of the grinding effect on the thermal annealing crystallization by grinding a half side of a pristine BFT2 film and then annealing the whole piece of film (a) and XRD patterns (b) and DSC thermograms of BFT2 (c) under different conditions. Photos were taken under UV irradiation at 365 nm.



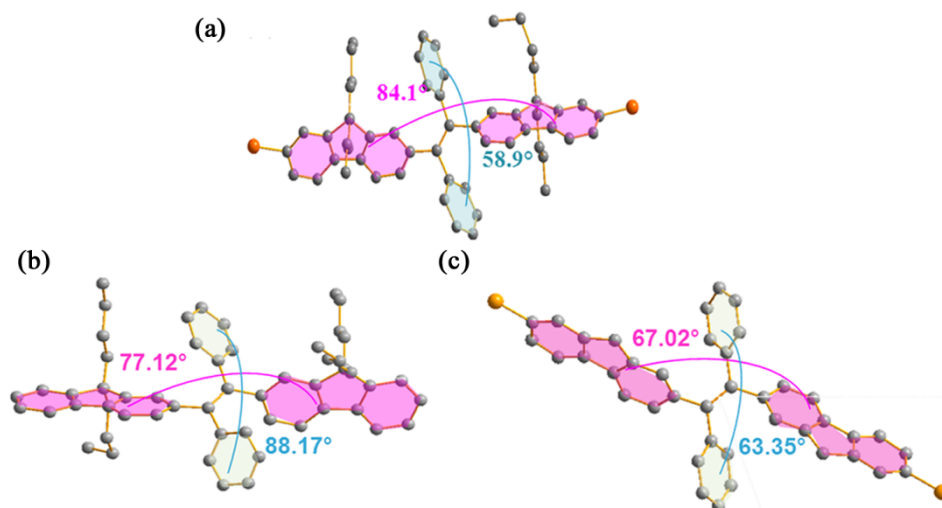

**Figure S10.** The crystal structures and dihedral angles between the aryl substituents of BBFT (a), BFT1 (b), BFT2 (c).

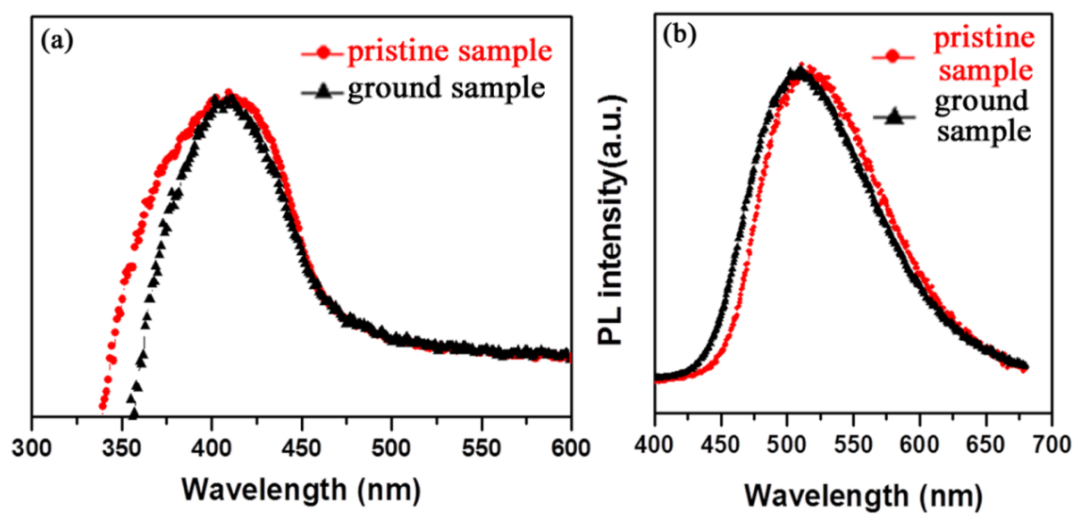

**Figure S11.** Normalized absorption (a) and emission (b) spectra of BFT1 solids under different conditions.

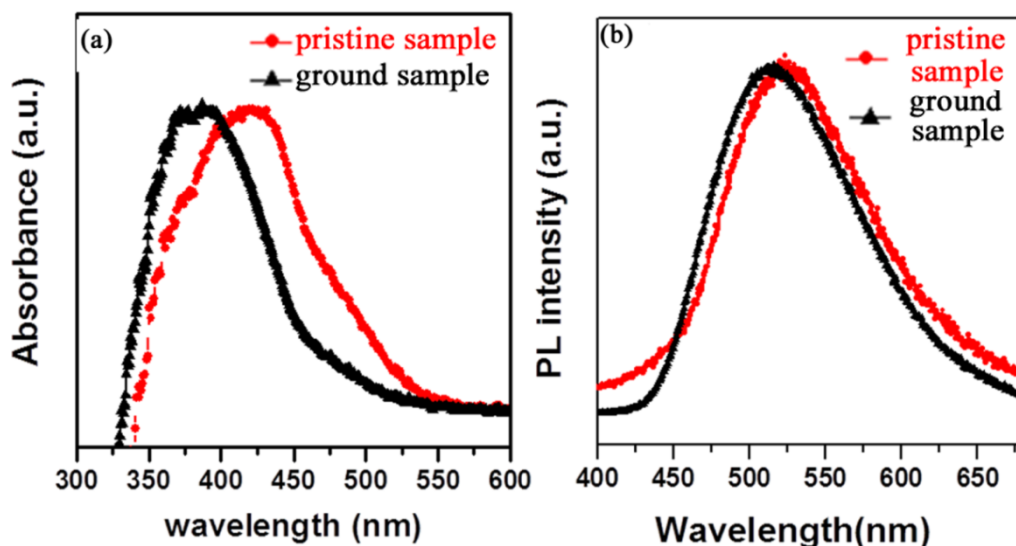

**Figure S12.** Normalized absorption (a) and emission (b) spectra of BFT2 solids under different conditions.

**Table S1.** Crystal data and structure refinement for BBFT.

|                                                 |                                                 |
|-------------------------------------------------|-------------------------------------------------|
| Compound                                        | BBFT                                            |
| Chemical formula                                | C <sub>56</sub> H <sub>58</sub> Br <sub>2</sub> |
| Formula Mass                                    | 890.84                                          |
| Crystal system                                  | Triclinic                                       |
| Space group                                     | P $\bar{1}$                                     |
| $a$ /(Å)                                        | 8.6456(16)                                      |
| $b$ /(Å)                                        | 12.310(2)                                       |
| $c$ /(Å)                                        | 22.758(4)                                       |
| $\alpha$ /°                                     | 98.677(2)                                       |
| $\beta$ /°                                      | 92.478(2)                                       |
| $\gamma$ /°                                     | 104.114(2)                                      |
| Unit cell volume/(Å <sup>3</sup> )              | 2314.0(7)                                       |
| $T$ /(K)                                        | 296(2)                                          |
| $Z$                                             | 2                                               |
| $F(000)$                                        | 928                                             |
| Absorption coefficient, $\mu$ /mm <sup>-1</sup> | 1.787                                           |
| Reflections measured/independent                | 22276/7919                                      |
| $R_{int}$                                       | 0.0456                                          |
| Final values (all data)                         | $R_1 = 0.0781$<br>$wR_2 = 0.1845$               |
| Goodness of fit on $F^2$                        | $R_1 = 0.1170$<br>$wR_2 = 0.2075$               |
| CCDC number                                     | 1.064<br>909142                                 |

---

**Table S2.** Crystal data and structure refinement for BFT1.

---

|                                                 |                                 |
|-------------------------------------------------|---------------------------------|
| Compound                                        | BFT1                            |
| Chemical formula                                | C <sub>56</sub> H <sub>60</sub> |
| Formula Mass                                    | 733.04                          |
| Crystal system                                  | Triclinic                       |
| Space group                                     | P $\bar{1}$                     |
| <i>a</i> /(Å)                                   | 11.1014(9)                      |
| <i>b</i> /(Å)                                   | 11.6074(9)                      |
| <i>c</i> /(Å)                                   | 17.9752(14)                     |
| $\alpha$ /°                                     | 101.9160(10)                    |
| $\beta$ /°                                      | 105.0510(10)                    |
| $\gamma$ /°                                     | 92.1080(10)                     |
| Unit cell volume/(Å <sup>3</sup> )              | 2178.6(3)                       |
| <i>T</i> /(K)                                   | 296(2)                          |
| <i>Z</i>                                        | 2                               |
| <i>F</i> (000)                                  | 792                             |
| Absorption coefficient, $\mu$ /mm <sup>-1</sup> | 0.063                           |
| Reflections measured/independent                | 25685/9872                      |
| <i>R</i> <sub>int</sub>                         | 0.0196                          |
|                                                 | <i>R</i> <sub>1</sub> = 0.0500  |
| Final values (all data)                         | <i>wR</i> <sub>2</sub> = 0.1136 |
|                                                 | <i>R</i> <sub>1</sub> = 0.0420  |
|                                                 | <i>wR</i> <sub>2</sub> = 0.1075 |
| Goodness of fit on <i>F</i> <sup>2</sup>        | 1.041                           |
| CCDC number                                     | 974227                          |

---

**Table S3.** Crystal data and structure refinement for BFT2.

---

|                                    |                                                 |
|------------------------------------|-------------------------------------------------|
| Compound                           | BFT2                                            |
| Chemical formula                   | C <sub>40</sub> H <sub>26</sub> Br <sub>2</sub> |
| Formula Mass                       | 666.41                                          |
| Crystal system                     | Monoclinic                                      |
| Space group                        | C2                                              |
| <i>a</i> /(Å)                      | 25.721(5)                                       |
| <i>b</i> /(Å)                      | 5.527(5)                                        |
| <i>c</i> /(Å)                      | 11.027(5)                                       |
| $\alpha$ /°                        | 90.000(5)                                       |
| $\beta$ /°                         | 110.517(5)                                      |
| $\gamma$ /°                        | 90.000(5)                                       |
| Unit cell volume/(Å <sup>3</sup> ) | 1468.2(15)                                      |

|                                              |                                  |
|----------------------------------------------|----------------------------------|
| <i>T</i> (K)                                 | 293(2)                           |
| <i>Z</i>                                     | 2                                |
| <i>F</i> (000)                               | 672                              |
| Absorption coefficient, $\mu/\text{mm}^{-1}$ | 2.789                            |
| <i>R</i> <sub>int</sub>                      | 0.000                            |
|                                              | <i>R</i> <sub>1</sub> = 0.0665   |
| Final values (all data)                      | w <i>R</i> <sub>2</sub> = 0.1589 |
|                                              | <i>R</i> <sub>1</sub> = 0.0531   |
|                                              | w <i>R</i> <sub>2</sub> = 0.1469 |
| Goodness of fit on <i>F</i> <sup>2</sup>     | 0.829                            |
| CCDC number                                  | 974229                           |

**Table S4.** Bond lengths [Å] for BBFT molecule.

|             |           |              |           |              |           |
|-------------|-----------|--------------|-----------|--------------|-----------|
| Br(1)-C(49) | 1.910(7)  | C(13)-C(45)  | 1.382(8)  | C(32)-C(44)  | 1.537(8)  |
| C(1)-C(56)  | 1.366(11) | C(13)-C(34)  | 1.389(8)  | C(33)-C(56)  | 1.393(10) |
| C(1)-C(55)  | 1.368(12) | C(13)-H(13)  | 0.93      | C(33)-H(33)  | 0.93      |
| C(1)-H(1)   | 0.93      | C(14)-C(49)  | 1.355(12) | C(34)-H(34)  | 0.93      |
| C(2)-C(53)  | 1.371(10) | C(14)-C(20)  | 1.380(10) | C(35)-C(37)  | 1.519(11) |
| C(2)-C(52)  | 1.391(9)  | C(14)-H(14)  | 0.93      | C(35)-H(35A) | 0.96      |
| C(2)-C(51)  | 1.504(9)  | C(15)-C(19)  | 1.405(8)  | C(35)-H(35B) | 0.96      |
| Br(2)-C(27) | 1.895(5)  | C(15)-C(51)  | 1.492(8)  | C(35)-H(35C) | 0.96      |
| C(3)-C(16)  | 1.388(8)  | C(16)-C(39)  | 1.390(8)  | C(36)-H(36A) | 0.96      |
| C(3)-C(21)  | 1.388(8)  | C(16)-C(45)  | 1.466(8)  | C(36)-H(36B) | 0.96      |
| C(3)-H(3)   | 0.93      | C(17)-C(21)  | 1.392(9)  | C(36)-H(36C) | 0.96      |
| C(4)-C(30)  | 1.385(9)  | C(17)-C(26)  | 1.396(8)  | C(37)-C(41)  | 1.563(10) |
| C(4)-C(20)  | 1.398(9)  | C(18)-C(40)  | 1.480(11) | C(37)-H(37A) | 0.97      |
| C(4)-C(23)  | 1.464(8)  | C(18)-C(44)  | 1.514(9)  | C(37)-H(37B) | 0.97      |
| C(5)-C(49)  | 1.377(11) | C(18)-H(18A) | 0.97      | C(38)-H(38)  | 0.93      |
| C(5)-C(30)  | 1.379(9)  | C(18)-H(18B) | 0.97      | C(39)-C(44)  | 1.531(8)  |
| C(5)-H(5)   | 0.93      | C(19)-C(22)  | 1.372(8)  | C(40)-C(47)  | 1.557(11) |
| C(6)-C(51)  | 1.332(9)  | C(19)-H(19)  | 0.93      | C(40)-H(40A) | 0.97      |
| C(6)-C(25)  | 1.484(9)  | C(20)-H(20)  | 0.93      | C(40)-H(40B) | 0.97      |
| C(6)-C(17)  | 1.509(8)  | C(21)-H(21)  | 0.93      | C(41)-H(41A) | 0.97      |
| C(7)-C(36)  | 1.453(13) | C(22)-C(23)  | 1.399(8)  | C(41)-H(41B) | 0.97      |
| C(7)-C(31)  | 1.551(11) | C(22)-C(46)  | 1.524(8)  | C(42)-C(47)  | 1.539(10) |
| C(7)-H(7A)  | 0.97      | C(23)-C(24)  | 1.375(8)  | C(42)-H(42A) | 0.96      |
| C(7)-H(7B)  | 0.97      | C(24)-H(24)  | 0.93      | C(42)-H(42B) | 0.96      |
| C(8)-C(29)  | 1.505(9)  | C(25)-C(33)  | 1.384(9)  | C(42)-H(42C) | 0.96      |
| C(8)-C(50)  | 1.522(10) | C(26)-C(39)  | 1.379(8)  | C(43)-C(50)  | 1.495(11) |
| C(8)-H(8A)  | 0.97      | C(26)-H(26)  | 0.93      | C(43)-H(43A) | 0.96      |
| C(8)-H(8B)  | 0.97      | C(27)-C(34)  | 1.378(9)  | C(43)-H(43B) | 0.96      |
| C(9)-C(31)  | 1.489(10) | C(27)-C(38)  | 1.383(8)  | C(43)-H(43C) | 0.96      |
| C(9)-C(46)  | 1.532(8)  | C(28)-C(41)  | 1.497(11) | C(47)-H(47A) | 0.97      |

|             |           |              |           |              |           |
|-------------|-----------|--------------|-----------|--------------|-----------|
| C(9)-H(9A)  | 0.97      | C(28)-C(44)  | 1.550(10) | C(47)-H(47B) | 0.97      |
| C(9)-H(9B)  | 0.97      | C(28)-H(28A) | 0.97      | C(48)-C(52)  | 1.382(11) |
| C(10)-C(48) | 1.359(12) | C(28)-H(28B) | 0.97      | C(48)-H(48)  | 0.93      |
| C(10)-C(54) | 1.378(12) | C(29)-C(46)  | 1.545(9)  | C(50)-H(50A) | 0.97      |
| C(10)-H(10) | 0.93      | C(29)-H(29A) | 0.97      | C(50)-H(50B) | 0.97      |
| C(11)-C(24) | 1.370(9)  | C(29)-H(29B) | 0.97      | C(52)-H(52)  | 0.93      |
| C(11)-C(15) | 1.391(9)  | C(30)-C(46)  | 1.533(8)  | C(53)-C(54)  | 1.397(10) |
| C(11)-H(11) | 0.93      | C(31)-H(31A) | 0.97      | C(53)-H(53)  | 0.93      |
| C(12)-C(25) | 1.383(9)  | C(31)-H(31B) | 0.97      | C(54)-H(54)  | 0.93      |
| C(12)-C(55) | 1.388(10) | C(32)-C(38)  | 1.377(8)  | C(55)-H(55)  | 0.93      |
| C(12)-H(12) | 0.93      | C(32)-C(45)  | 1.402(8)  | C(56)-H(56)  | 0.93      |

**Table S5.** Bond angles [deg] for BBFT molecule.

|                  |          |                    |          |                         |          |
|------------------|----------|--------------------|----------|-------------------------|----------|
| C(56)-C(1)-C(55) | 119.2(7) | C(17)-C(21)-H(21)  | 118.9    | C(18)-C(40)-H(40A)      | 110.1    |
| C(56)-C(1)-H(1)  | 120.4    | C(19)-C(22)-C(23)  | 120.2(5) | C(47)-C(40)-H(40A)      | 110.1    |
| C(55)-C(1)-H(1)  | 120.4    | C(19)-C(22)-C(46)  | 129.1(5) | C(18)-C(40)-H(40B)      | 110.1    |
| C(53)-C(2)-C(52) | 118.4(6) | C(23)-C(22)-C(46)  | 110.7(5) | C(47)-C(40)-H(40B)      | 110.1    |
| C(53)-C(2)-C(51) | 121.2(6) | C(24)-C(23)-C(22)  | 120.8(5) | H(40A)-C(40)-<br>H(40B) | 108.4    |
| C(52)-C(2)-C(51) | 120.4(6) | C(24)-C(23)-C(4)   | 130.6(5) | C(28)-C(41)-C(37)       | 115.4(7) |
| C(16)-C(3)-C(21) | 118.2(6) | C(22)-C(23)-C(4)   | 108.6(5) | C(28)-C(41)-H(41A)      | 108.4    |
| C(16)-C(3)-H(3)  | 120.9    | C(11)-C(24)-C(23)  | 118.8(6) | C(37)-C(41)-H(41A)      | 108.4    |
| C(21)-C(3)-H(3)  | 120.9    | C(11)-C(24)-H(24)  | 120.6    | C(28)-C(41)-H(41B)      | 108.4    |
| C(30)-C(4)-C(20) | 120.5(6) | C(23)-C(24)-H(24)  | 120.6    | C(37)-C(41)-H(41B)      | 108.4    |
| C(30)-C(4)-C(23) | 108.7(5) | C(12)-C(25)-C(33)  | 117.5(6) | H(41A)-C(41)-<br>H(41B) | 107.5    |
| C(20)-C(4)-C(23) | 130.7(6) | C(12)-C(25)-C(6)   | 122.3(6) | C(47)-C(42)-H(42A)      | 109.5    |
| C(49)-C(5)-C(30) | 118.3(7) | C(33)-C(25)-C(6)   | 120.1(6) | C(47)-C(42)-H(42B)      | 109.5    |
| C(49)-C(5)-H(5)  | 120.8    | C(39)-C(26)-C(17)  | 119.9(6) | H(42A)-C(42)-<br>H(42B) | 109.5    |
| C(30)-C(5)-H(5)  | 120.8    | C(39)-C(26)-H(26)  | 120.1    | C(47)-C(42)-H(42C)      | 109.5    |
| C(51)-C(6)-C(25) | 126.2(5) | C(17)-C(26)-H(26)  | 120.1    | H(42A)-C(42)-<br>H(42C) | 109.5    |
| C(51)-C(6)-C(17) | 120.3(6) | C(34)-C(27)-C(38)  | 122.4(5) | H(42B)-C(42)-<br>H(42C) | 109.5    |
| C(25)-C(6)-C(17) | 113.5(5) | C(34)-C(27)-Br(2)  | 118.6(4) | C(50)-C(43)-H(43A)      | 109.5    |
| C(36)-C(7)-C(31) | 112.9(8) | C(38)-C(27)-Br(2)  | 119.0(4) | C(50)-C(43)-H(43B)      | 109.5    |
| C(36)-C(7)-H(7A) | 109      | C(41)-C(28)-C(44)  | 116.6(5) | H(43A)-C(43)-<br>H(43B) | 109.5    |
| C(31)-C(7)-H(7A) | 109      | C(41)-C(28)-H(28A) | 108.1    | C(50)-C(43)-H(43C)      | 109.5    |
| C(36)-C(7)-H(7B) | 109      | C(44)-C(28)-H(28A) | 108.1    | H(43A)-C(43)-<br>H(43C) | 109.5    |
| C(31)-C(7)-H(7B) | 109      | C(41)-C(28)-H(28B) | 108.1    | H(43B)-C(43)-           | 109.5    |

|                       |          |                         |          | H(43C)                  |          |  |
|-----------------------|----------|-------------------------|----------|-------------------------|----------|--|
| H(7A)-C(7)-<br>H(7B)  | 107.8    | C(44)-C(28)-H(28B)      | 108.1    | C(18)-C(44)-C(39)       | 112.2(5) |  |
| C(29)-C(8)-C(50)      | 110.8(6) | H(28A)-C(28)-<br>H(28B) | 107.3    | C(18)-C(44)-C(32)       | 111.9(5) |  |
| C(29)-C(8)-H(8A)      | 109.5    | C(8)-C(29)-C(46)        | 116.2(5) | C(39)-C(44)-C(32)       | 100.0(5) |  |
| C(50)-C(8)-H(8A)      | 109.5    | C(8)-C(29)-H(29A)       | 108.2    | C(18)-C(44)-C(28)       | 107.8(6) |  |
| C(29)-C(8)-H(8B)      | 109.5    | C(46)-C(29)-H(29A)      | 108.2    | C(39)-C(44)-C(28)       | 111.7(5) |  |
| C(50)-C(8)-H(8B)      | 109.5    | C(8)-C(29)-H(29B)       | 108.2    | C(32)-C(44)-C(28)       | 113.1(5) |  |
| H(8A)-C(8)-<br>H(8B)  | 108.1    | C(46)-C(29)-H(29B)      | 108.2    | C(13)-C(45)-C(32)       | 120.0(5) |  |
| C(31)-C(9)-C(46)      | 116.9(5) | H(29A)-C(29)-<br>H(29B) | 107.4    | C(13)-C(45)-C(16)       | 132.0(6) |  |
| C(31)-C(9)-H(9A)      | 108.1    | C(5)-C(30)-C(4)         | 119.9(6) | C(32)-C(45)-C(16)       | 107.9(5) |  |
| C(46)-C(9)-H(9A)      | 108.1    | C(5)-C(30)-C(46)        | 128.9(6) | C(22)-C(46)-C(9)        | 114.0(5) |  |
| C(31)-C(9)-H(9B)      | 108.1    | C(4)-C(30)-C(46)        | 111.1(5) | C(22)-C(46)-C(30)       | 100.8(5) |  |
| C(46)-C(9)-H(9B)      | 108.1    | C(9)-C(31)-C(7)         | 111.8(6) | C(9)-C(46)-C(30)        | 111.2(5) |  |
| H(9A)-C(9)-<br>H(9B)  | 107.3    | C(9)-C(31)-H(31A)       | 109.3    | C(22)-C(46)-C(29)       | 110.4(5) |  |
| C(48)-C(10)-<br>C(54) | 120.5(7) | C(7)-C(31)-H(31A)       | 109.3    | C(9)-C(46)-C(29)        | 107.5(5) |  |
| C(48)-C(10)-<br>H(10) | 119.7    | C(9)-C(31)-H(31B)       | 109.3    | C(30)-C(46)-C(29)       | 113.0(5) |  |
| C(54)-C(10)-<br>H(10) | 119.7    | C(7)-C(31)-H(31B)       | 109.3    | C(42)-C(47)-C(40)       | 110.0(8) |  |
| C(24)-C(11)-<br>C(15) | 122.0(6) | H(31A)-C(31)-<br>H(31B) | 107.9    | C(42)-C(47)-H(47A)      | 109.7    |  |
| C(24)-C(11)-<br>H(11) | 119      | C(38)-C(32)-C(45)       | 120.7(5) | C(40)-C(47)-H(47A)      | 109.7    |  |
| C(15)-C(11)-<br>H(11) | 119      | C(38)-C(32)-C(44)       | 127.9(5) | C(42)-C(47)-H(47B)      | 109.7    |  |
| C(25)-C(12)-<br>C(55) | 120.7(7) | C(45)-C(32)-C(44)       | 111.4(5) | C(40)-C(47)-H(47B)      | 109.7    |  |
| C(25)-C(12)-<br>H(12) | 119.7    | C(25)-C(33)-C(56)       | 121.5(7) | H(47A)-C(47)-<br>H(47B) | 108.2    |  |
| C(55)-C(12)-<br>H(12) | 119.7    | C(25)-C(33)-H(33)       | 119.2    | C(10)-C(48)-C(52)       | 120.3(8) |  |
| C(45)-C(13)-<br>C(34) | 119.6(6) | C(56)-C(33)-H(33)       | 119.2    | C(10)-C(48)-H(48)       | 119.9    |  |
| C(45)-C(13)-<br>H(13) | 120.2    | C(27)-C(34)-C(13)       | 119.2(5) | C(52)-C(48)-H(48)       | 119.9    |  |
| C(34)-C(13)-<br>H(13) | 120.2    | C(27)-C(34)-H(34)       | 120.4    | C(14)-C(49)-C(5)        | 122.8(7) |  |
| C(49)-C(14)-          | 119.5(7) | C(13)-C(34)-H(34)       | 120.4    | C(14)-C(49)-Br(1)       | 117.6(6) |  |

|                         |          |                         |          |                         |          |
|-------------------------|----------|-------------------------|----------|-------------------------|----------|
| C(20)                   |          |                         |          |                         |          |
| C(49)-C(14)-<br>H(14)   | 120.3    | C(37)-C(35)-H(35A)      | 109.5    | C(5)-C(49)-Br(1)        | 119.5(7) |
| C(20)-C(14)-<br>H(14)   | 120.3    | C(37)-C(35)-H(35B)      | 109.5    | C(43)-C(50)-C(8)        | 113.5(7) |
| C(11)-C(15)-<br>C(19)   | 118.7(5) | H(35A)-C(35)-<br>H(35B) | 109.5    | C(43)-C(50)-H(50A)      | 108.9    |
| C(11)-C(15)-<br>C(51)   | 118.2(5) | C(37)-C(35)-H(35C)      | 109.5    | C(8)-C(50)-H(50A)       | 108.9    |
| C(19)-C(15)-<br>C(51)   | 123.0(5) | H(35A)-C(35)-<br>H(35C) | 109.5    | C(43)-C(50)-H(50B)      | 108.9    |
| C(3)-C(16)-C(39)        | 120.4(5) | H(35B)-C(35)-<br>H(35C) | 109.5    | C(8)-C(50)-H(50B)       | 108.9    |
| C(3)-C(16)-C(45)        | 130.6(6) | C(7)-C(36)-H(36A)       | 109.5    | H(50A)-C(50)-<br>H(50B) | 107.7    |
| C(39)-C(16)-<br>C(45)   | 109.0(5) | C(7)-C(36)-H(36B)       | 109.5    | C(6)-C(51)-C(15)        | 124.5(6) |
| C(21)-C(17)-<br>C(26)   | 118.4(5) | H(36A)-C(36)-<br>H(36B) | 109.5    | C(6)-C(51)-C(2)         | 120.5(5) |
| C(21)-C(17)-C(6)        | 122.0(5) | C(7)-C(36)-H(36C)       | 109.5    | C(15)-C(51)-C(2)        | 115.0(5) |
| C(26)-C(17)-C(6)        | 119.6(5) | H(36A)-C(36)-<br>H(36C) | 109.5    | C(48)-C(52)-C(2)        | 120.6(8) |
| C(40)-C(18)-<br>C(44)   | 114.5(6) | H(36B)-C(36)-<br>H(36C) | 109.5    | C(48)-C(52)-H(52)       | 119.7    |
| C(40)-C(18)-<br>H(18A)  | 108.6    | C(35)-C(37)-C(41)       | 111.0(7) | C(2)-C(52)-H(52)        | 119.7    |
| C(44)-C(18)-<br>H(18A)  | 108.6    | C(35)-C(37)-H(37A)      | 109.4    | C(2)-C(53)-C(54)        | 121.2(7) |
| C(40)-C(18)-<br>H(18B)  | 108.6    | C(41)-C(37)-H(37A)      | 109.4    | C(2)-C(53)-H(53)        | 119.4    |
| C(44)-C(18)-<br>H(18B)  | 108.6    | C(35)-C(37)-H(37B)      | 109.4    | C(54)-C(53)-H(53)       | 119.4    |
| H(18A)-C(18)-<br>H(18B) | 107.6    | C(41)-C(37)-H(37B)      | 109.4    | C(10)-C(54)-C(53)       | 119.0(8) |
| C(22)-C(19)-<br>C(15)   | 119.6(5) | H(37A)-C(37)-<br>H(37B) | 108      | C(10)-C(54)-H(54)       | 120.5    |
| C(22)-C(19)-<br>H(19)   | 120.2    | C(32)-C(38)-C(27)       | 118.1(6) | C(53)-C(54)-H(54)       | 120.5    |
| C(15)-C(19)-<br>H(19)   | 120.2    | C(32)-C(38)-H(38)       | 121      | C(1)-C(55)-C(12)        | 121.1(7) |
| C(14)-C(20)-C(4)        | 118.9(7) | C(27)-C(38)-H(38)       | 121      | C(1)-C(55)-H(55)        | 119.5    |
| C(14)-C(20)-<br>H(20)   | 120.5    | C(26)-C(39)-C(16)       | 120.8(6) | C(12)-C(55)-H(55)       | 119.5    |
| C(4)-C(20)-H(20)        | 120.5    | C(26)-C(39)-C(44)       | 127.7(6) | C(1)-C(56)-C(33)        | 120.0(8) |

|                  |          |                   |          |                   |     |
|------------------|----------|-------------------|----------|-------------------|-----|
| C(3)-C(21)-C(17) | 122.2(6) | C(16)-C(39)-C(44) | 111.5(5) | C(1)-C(56)-H(56)  | 120 |
| C(3)-C(21)-H(21) | 118.9    | C(18)-C(40)-C(47) | 108.0(7) | C(33)-C(56)-H(56) | 120 |

**Table S6.** Bond lengths [Å] for the optimized BBFT molecule.

|             |       |              |       |              |       |
|-------------|-------|--------------|-------|--------------|-------|
| Br(1)-C(49) | 1.95  | C(13)-C(45)  | 1.398 | C(32)-C(44)  | 1.533 |
| C(1)-C(56)  | 1.401 | C(13)-C(34)  | 1.401 | C(33)-C(56)  | 1.398 |
| C(1)-C(55)  | 1.401 | C(13)-H(13)  | 1.085 | C(33)-H(33)  | 1.085 |
| C(1)-H(1)   | 1.085 | C(14)-C(49)  | 1.395 | C(34)-H(34)  | 1.083 |
| C(2)-C(53)  | 1.41  | C(14)-C(20)  | 1.401 | C(35)-C(37)  | 1.539 |
| C(2)-C(52)  | 1.409 | C(14)-H(14)  | 1.083 | C(35)-H(35A) | 1.096 |
| C(2)-C(51)  | 1.498 | C(15)-C(19)  | 1.414 | C(35)-H(35B) | 1.096 |
| Br(2)-C(27) | 1.95  | C(15)-C(51)  | 1.496 | C(35)-H(35C) | 1.097 |
| C(3)-C(16)  | 1.398 | C(16)-C(39)  | 1.415 | C(36)-H(36A) | 1.097 |
| C(3)-C(21)  | 1.398 | C(16)-C(45)  | 1.469 | C(36)-H(36B) | 1.096 |
| C(3)-H(3)   | 1.086 | C(17)-C(21)  | 1.411 | C(36)-H(36C) | 1.097 |
| C(4)-C(30)  | 1.416 | C(17)-C(26)  | 1.414 | C(37)-C(41)  | 1.544 |
| C(4)-C(20)  | 1.398 | C(18)-C(40)  | 1.538 | C(37)-H(37A) | 1.099 |
| C(4)-C(23)  | 1.468 | C(18)-C(44)  | 1.565 | C(37)-H(37B) | 1.1   |
| C(5)-C(49)  | 1.397 | C(18)-H(18A) | 1.1   | C(38)-H(38)  | 1.084 |
| C(5)-C(30)  | 1.392 | C(18)-H(18B) | 1.1   | C(39)-C(44)  | 1.534 |
| C(5)-H(5)   | 1.084 | C(19)-C(22)  | 1.39  | C(40)-C(47)  | 1.541 |
| C(6)-C(51)  | 1.371 | C(19)-H(19)  | 1.085 | C(40)-H(40A) | 1.099 |
| C(6)-C(25)  | 1.497 | C(20)-H(20)  | 1.085 | C(40)-H(40B) | 1.098 |
| C(6)-C(17)  | 1.496 | C(21)-H(21)  | 1.084 | C(41)-H(41A) | 1.098 |
| C(7)-C(36)  | 1.537 | C(22)-C(23)  | 1.415 | C(41)-H(41B) | 1.099 |
| C(7)-C(31)  | 1.541 | C(22)-C(46)  | 1.535 | C(42)-C(47)  | 1.537 |
| C(7)-H(7A)  | 1.1   | C(23)-C(24)  | 1.398 | C(42)-H(42A) | 1.097 |
| C(7)-H(7B)  | 1.1   | C(24)-H(24)  | 1.086 | C(42)-H(42B) | 1.096 |
| C(8)-C(29)  | 1.538 | C(25)-C(33)  | 1.41  | C(42)-H(42C) | 1.098 |
| C(8)-C(50)  | 1.541 | C(26)-C(39)  | 1.389 | C(43)-C(50)  | 1.537 |
| C(8)-H(8A)  | 1.099 | C(26)-H(26)  | 1.086 | C(43)-H(43A) | 1.097 |
| C(8)-H(8B)  | 1.098 | C(27)-C(34)  | 1.395 | C(43)-H(43B) | 1.096 |
| C(9)-C(31)  | 1.538 | C(27)-C(38)  | 1.397 | C(43)-H(43C) | 1.097 |
| C(9)-C(46)  | 1.564 | C(28)-C(41)  | 1.539 | C(47)-H(47A) | 1.1   |
| C(9)-H(9A)  | 1.1   | C(28)-C(44)  | 1.563 | C(47)-H(47B) | 1.1   |
| C(9)-H(9B)  | 1.1   | C(28)-H(28A) | 1.101 | C(48)-C(52)  | 1.397 |
| C(10)-C(48) | 1.4   | C(28)-H(28B) | 1.098 | C(48)-H(48)  | 1.086 |
| C(10)-C(54) | 1.4   | C(29)-C(46)  | 1.563 | C(50)-H(50A) | 1.1   |
| C(10)-H(10) | 1.085 | C(29)-H(29A) | 1.1   | C(50)-H(50B) | 1.1   |
| C(11)-C(24) | 1.397 | C(29)-H(29B) | 1.1   | C(52)-H(52)  | 1.085 |
| C(11)-C(15) | 1.413 | C(30)-C(46)  | 1.533 | C(53)-C(54)  | 1.398 |
| C(11)-H(11) | 1.085 | C(31)-H(31A) | 1.099 | C(53)-H(53)  | 1.085 |
| C(12)-C(25) | 1.409 | C(31)-H(31B) | 1.099 | C(54)-H(54)  | 1.086 |



|             |       |             |       |             |       |
|-------------|-------|-------------|-------|-------------|-------|
| C(12)-C(55) | 1.398 | C(32)-C(38) | 1.392 | C(55)-H(55) | 1.086 |
| C(12)-H(12) | 1.084 | C(32)-C(45) | 1.416 | C(56)-H(56) | 1.086 |

**Table S7.** Bond angles [deg] for the optimized BBFT molecule.

|                  |       |                   |       |                     |       |
|------------------|-------|-------------------|-------|---------------------|-------|
| C(56)-C(1)-C(55) | 119.5 | C(17)-C(21)-H(21) | 118.9 | C(18)-C(40)-H(40A)  | 110.0 |
| C(56)-C(1)-H(1)  | 120.3 | C(19)-C(22)-C(23) | 120.4 | C(47)-C(40)-H(40A)  | 109.2 |
| C(55)-C(1)-H(1)  | 120.2 | C(19)-C(22)-C(46) | 128.6 | C(18)-C(40)-H(40B)  | 110.0 |
| C(53)-C(2)-C(52) | 118.2 | C(23)-C(22)-C(46) | 110.9 | C(47)-C(40)-H(40B)  | 109.1 |
| C(53)-C(2)-C(51) | 120.6 | C(24)-C(23)-C(22) | 120.2 | H(40A)-C(40)-H(40B) | 106.5 |
| C(52)-C(2)-C(51) | 121.2 | C(24)-C(23)-C(4)  | 131.2 | C(28)-C(41)-C(37)   | 113.6 |
| C(16)-C(3)-C(21) | 119.1 | C(22)-C(23)-C(4)  | 108.6 | C(28)-C(41)-H(41A)  | 109.2 |
| C(16)-C(3)-H(3)  | 121.0 | C(11)-C(24)-C(23) | 119.1 | C(37)-C(41)-H(41A)  | 108.8 |
| C(21)-C(3)-H(3)  | 119.9 | C(11)-C(24)-H(24) | 119.9 | C(28)-C(41)-H(41B)  | 109.4 |
| C(30)-C(4)-C(20) | 120.5 | C(23)-C(24)-H(24) | 121.0 | C(37)-C(41)-H(41B)  | 109.0 |
| C(30)-C(4)-C(23) | 108.4 | C(12)-C(25)-C(33) | 118.2 | H(41A)-C(41)-H(41B) | 106.6 |
| C(20)-C(4)-C(23) | 131.1 | C(12)-C(25)-C(6)  | 121.2 | C(47)-C(42)-H(42A)  | 111.0 |
| C(49)-C(5)-C(30) | 118.1 | C(33)-C(25)-C(6)  | 120.5 | C(47)-C(42)-H(42B)  | 111.4 |
| C(49)-C(5)-H(5)  | 120.1 | C(39)-C(26)-C(17) | 120.1 | H(42A)-C(42)-H(42B) | 107.8 |
| C(30)-C(5)-H(5)  | 121.8 | C(39)-C(26)-H(26) | 120.8 | C(47)-C(42)-H(42C)  | 111.0 |
| C(51)-C(6)-C(25) | 122.8 | C(17)-C(26)-H(26) | 119.2 | H(42A)-C(42)-H(42C) | 107.6 |
| C(51)-C(6)-C(17) | 122.6 | C(34)-C(27)-C(38) | 122.5 | H(42B)-C(42)-H(42C) | 107.8 |
| C(25)-C(6)-C(17) | 114.5 | C(34)-C(27)-Br(2) | 118.9 | C(50)-C(43)-H(43A)  | 110.9 |
| C(36)-C(7)-C(31) | 112.9 | C(38)-C(27)-Br(2) | 118.6 | C(50)-C(43)-H(43B)  | 111.4 |
| C(36)-C(7)-H(7A) | 109.5 | C(41)-C(28)-C(44) | 115.9 | H(43A)-C(43)-H(43B) | 107.8 |

|                   |       |                     |       |                         |       |
|-------------------|-------|---------------------|-------|-------------------------|-------|
| C(31)-C(7)-H(7A)  | 109.3 | C(41)-C(28)-H(28A)  | 109.2 | C(50)-C(43)-<br>H(43C)  | 111.1 |
| C(36)-C(7)-H(7B)  | 109.5 | C(44)-C(28)-H(28A)  | 107.9 | H(43A)-C(43)-<br>H(43C) | 107.6 |
| C(31)-C(7)-H(7B)  | 109.3 | C(41)-C(28)-H(28B)  | 109.7 | H(43B)-C(43)-<br>H(43C) | 107.8 |
| H(7A)-C(7)-H(7B)  | 106.2 | C(44)-C(28)-H(28B)  | 107.4 | C(18)-C(44)-C(39)       | 111.8 |
| C(29)-C(8)-C(50)  | 112.3 | H(28A)-C(28)-H(28B) | 106.3 | C(18)-C(44)-C(32)       | 111.7 |
| C(29)-C(8)-H(8A)  | 109.7 | C(8)-C(29)-C(46)    | 116.3 | C(39)-C(44)-C(32)       | 101.0 |
| C(50)-C(8)-H(8A)  | 109.1 | C(8)-C(29)-H(29A)   | 109.1 | C(18)-C(44)-C(28)       | 107.9 |
| C(29)-C(8)-H(8B)  | 109.7 | C(46)-C(29)-H(29A)  | 107.8 | C(39)-C(44)-C(28)       | 112.2 |
| C(50)-C(8)-H(8B)  | 109.1 | C(8)-C(29)-H(29B)   | 109.2 | C(32)-C(44)-C(28)       | 112.2 |
| H(8A)-C(8)-H(8B)  | 106.7 | C(46)-C(29)-H(29B)  | 107.8 | C(13)-C(45)-C(32)       | 120.5 |
| C(31)-C(9)-C(46)  | 116.2 | H(29A)-C(29)-H(29B) | 106.3 | C(13)-C(45)-C(16)       | 131.1 |
| C(31)-C(9)-H(9A)  | 109.2 | C(5)-C(30)-C(4)     | 120.4 | C(32)-C(45)-C(16)       | 108.4 |
| C(46)-C(9)-H(9A)  | 107.7 | C(5)-C(30)-C(46)    | 128.6 | C(22)-C(46)-C(9)        | 111.8 |
| C(31)-C(9)-H(9B)  | 109.2 | C(4)-C(30)-C(46)    | 111.0 | C(22)-C(46)-C(30)       | 101.0 |
| C(46)-C(9)-H(9B)  | 107.8 | C(9)-C(31)-C(7)     | 112.5 | C(9)-C(46)-C(30)        | 111.8 |
| H(9A)-C(9)-H(9B)  | 106.3 | C(9)-C(31)-H(31A)   | 109.6 | C(22)-C(46)-C(29)       | 112.3 |
| C(48)-C(10)-C(54) | 119.5 | C(7)-C(31)-H(31A)   | 109.2 | C(9)-C(46)-C(29)        | 108.0 |
| C(48)-C(10)-H(10) | 120.2 | C(9)-C(31)-H(31B)   | 109.7 | C(30)-C(46)-C(29)       | 111.9 |
| C(54)-C(10)-H(10) | 120.2 | C(7)-C(31)-H(31B)   | 109.1 | C(42)-C(47)-C(40)       | 112.9 |
| C(24)-C(11)-C(15) | 121.5 | H(31A)-C(31)-H(31B) | 106.5 | C(42)-C(47)-<br>H(47A)  | 109.5 |
| C(24)-C(11)-H(11) | 119.6 | C(38)-C(32)-C(45)   | 120.4 | C(40)-C(47)-<br>H(47A)  | 109.3 |
| C(15)-C(11)-H(11) | 119.0 | C(38)-C(32)-C(44)   | 128.6 | C(42)-C(47)-<br>H(47B)  | 109.5 |
| C(25)-C(12)-C(55) | 120.9 | C(45)-C(32)-C(44)   | 111.0 | C(40)-C(47)-<br>H(47B)  | 109.3 |
| C(25)-C(12)-H(12) | 119.2 | C(25)-C(33)-C(56)   | 120.9 | H(47A)-C(47)-<br>H(47B) | 106.2 |
| C(55)-C(12)-H(12) | 119.9 | C(25)-C(33)-H(33)   | 119.2 | C(10)-C(48)-C(52)       | 120.3 |
| C(45)-C(13)-C(34) | 119.3 | C(56)-C(33)-H(33)   | 119.9 | C(10)-C(48)-H(48)       | 120.1 |
| C(45)-C(13)-H(13) | 121.0 | C(27)-C(34)-C(13)   | 119.3 | C(52)-C(48)-H(48)       | 119.7 |
| C(34)-C(13)-H(13) | 119.7 | C(27)-C(34)-H(34)   | 120.0 | C(14)-C(49)-C(5)        | 122.5 |
| C(49)-C(14)-C(20) | 119.3 | C(13)-C(34)-H(34)   | 120.7 | C(14)-C(49)-Br(1)       | 118.9 |
| C(49)-C(14)-H(14) | 120.0 | C(37)-C(35)-H(35A)  | 111.9 | C(5)-C(49)-Br(1)        | 118.7 |
| C(20)-C(14)-H(14) | 120.7 | C(37)-C(35)-H(35B)  | 111.0 | C(43)-C(50)-C(8)        | 112.9 |
| C(11)-C(15)-C(19) | 118.7 | H(35A)-C(35)-H(35B) | 107.4 | C(43)-C(50)-<br>H(50A)  | 109.4 |
| C(11)-C(15)-C(51) | 120.1 | C(37)-C(35)-H(35C)  | 111.0 | C(8)-C(50)-H(50A)       | 109.3 |
| C(19)-C(15)-C(51) | 121.0 | H(35A)-C(35)-H(35C) | 107.5 | C(43)-C(50)-<br>H(50B)  | 109.5 |

|                         |       |                     |       |                         |       |
|-------------------------|-------|---------------------|-------|-------------------------|-------|
| C(3)-C(16)-C(39)        | 120.2 | H(35B)-C(35)-H(35C) | 107.9 | C(8)-C(50)-H(50B)       | 109.1 |
| C(3)-C(16)-C(45)        | 131.3 | C(7)-C(36)-H(36A)   | 111.0 | H(50A)-C(50)-<br>H(50B) | 106.4 |
| C(39)-C(16)-C(45)       | 108.6 | C(7)-C(36)-H(36B)   | 111.4 | C(6)-C(51)-C(15)        | 122.9 |
| C(21)-C(17)-C(26)       | 118.8 | H(36A)-C(36)-H(36B) | 107.8 | C(6)-C(51)-C(2)         | 122.4 |
| C(21)-C(17)-C(6)        | 121.0 | C(7)-C(36)-H(36C)   | 111.1 | C(15)-C(51)-C(2)        | 114.8 |
| C(26)-C(17)-C(6)        | 120.2 | H(36A)-C(36)-H(36C) | 107.6 | C(48)-C(52)-C(2)        | 120.9 |
| C(40)-C(18)-C(44)       | 116.3 | H(36B)-C(36)-H(36C) | 107.8 | C(48)-C(52)-H(52)       | 119.9 |
| C(40)-C(18)-<br>H(18A)  | 109.2 | C(35)-C(37)-C(41)   | 114.4 | C(2)-C(52)-H(52)        | 119.2 |
| C(44)-C(18)-<br>H(18A)  | 107.6 | C(35)-C(37)-H(37A)  | 109.0 | C(2)-C(53)-C(54)        | 120.9 |
| C(40)-C(18)-<br>H(18B)  | 109.2 | C(41)-C(37)-H(37A)  | 108.3 | C(2)-C(53)-H(53)        | 119.2 |
| C(44)-C(18)-<br>H(18B)  | 107.9 | C(35)-C(37)-H(37B)  | 109.5 | C(54)-C(53)-H(53)       | 119.9 |
| H(18A)-C(18)-<br>H(18B) | 106.3 | C(41)-C(37)-H(37B)  | 109.3 | C(10)-C(54)-C(53)       | 120.2 |
| C(22)-C(19)-C(15)       | 120.0 | H(37A)-C(37)-H(37B) | 106.1 | C(10)-C(54)-H(54)       | 120.1 |
| C(22)-C(19)-H(19)       | 120.9 | C(32)-C(38)-C(27)   | 118.1 | C(53)-C(54)-H(54)       | 119.7 |
| C(15)-C(19)-H(19)       | 119.1 | C(32)-C(38)-H(38)   | 121.8 | C(1)-C(55)-C(12)        | 120.3 |
| C(14)-C(20)-C(4)        | 119.3 | C(27)-C(38)-H(38)   | 120.1 | C(1)-C(55)-H(55)        | 120.0 |
| C(14)-C(20)-H(20)       | 119.7 | C(26)-C(39)-C(16)   | 120.4 | C(12)-C(55)-H(55)       | 119.7 |
| C(4)-C(20)-H(20)        | 121.0 | C(26)-C(39)-C(44)   | 128.6 | C(1)-C(56)-C(33)        | 120.2 |
| C(3)-C(21)-C(17)        | 121.4 | C(16)-C(39)-C(44)   | 111.0 | C(1)-C(56)-H(56)        | 120.1 |
| C(3)-C(21)-H(21)        | 119.7 | C(18)-C(40)-C(47)   | 112.5 | C(33)-C(56)-H(56)       | 119.7 |

---
